# Supplementary material for: Children and young people’s mental health in the English-speaking Caribbean: a scoping review and evidence map
Source: Springer Nature journal article supplement (doi:10.1186/s13034-021-00435-w), 2021-12-30
Supplement: MOESM2 [file 19978316]

**Supplementary Information 2. Characteristics of the reviewed studies (K=96)**

| Reference: First author, year of publication | Country  | Study aim(s)                                                                                                                                                                                                             | Presenting problem explored                                                      | Outcome measures                                                                                                                                                                                           | Study design | Sample size | MeanAge (SD) or age range in years | Predominant sex (%)                  | Primary recruitment setting | Funding source                                        | Key finding(s)                                                                                                                                                                                                                                                                                                                                                                                                                                                                           |
|----------------------------------------------|----------|--------------------------------------------------------------------------------------------------------------------------------------------------------------------------------------------------------------------------|----------------------------------------------------------------------------------|------------------------------------------------------------------------------------------------------------------------------------------------------------------------------------------------------------|--------------|-------------|------------------------------------|--------------------------------------|-----------------------------|-------------------------------------------------------|------------------------------------------------------------------------------------------------------------------------------------------------------------------------------------------------------------------------------------------------------------------------------------------------------------------------------------------------------------------------------------------------------------------------------------------------------------------------------------------|
| Griffith, 2020                               | Barbados | To examine how teachers identify and respond to social-emotional, behavioural, and learning challenges.                                                                                                                  | Multiple: socioemotional and behavioural challenges                              | Author developed/adapted questionnaire                                                                                                                                                                     | Quantitative | 90          | 2 to 7                             | Unclear                              | Education                   | None reported                                         | Teachers on average reported one-third of children in their classes had significant socioemotional and behavioural challenges. Few teachers reported using screening measures to assess for these difficulties, and teachers generally reported that their training in identifying young children with socioemotional, behavioural or learning difficulties was inadequate.                                                                                                              |
| Harrison, 2020                               | Jamaica  | To explore disordered eating and identify those adolescents most at risk.                                                                                                                                                | Disordered Eating Behaviours and Attitudes                                       | Eating Attitude Test (EAT); Rosenberg Self-Esteem (RSE) scale                                                                                                                                              | Quantitative | 521         | 14.8 (not specified)               | 56.05% females                       | Education                   | Caribbean Public Health Agency (CARPHA).              | 31% percent of participants reported engaging in at least one disordered eating behaviour, with bingeing as the most common. Female participants had significantly higher mean body mass index and mean EAT-26 score compared to males.                                                                                                                                                                                                                                                  |
| Maloney, 2020                                | Jamaica  | To examine digital mental health (mHealth) infrastructure in Jamaica; receptiveness to mHealth resources; identify barriers to treatment and treatment preferences; and measure treatment optimism and mHealth interest. | Any                                                                              | Author developed/adapted questionnaire                                                                                                                                                                     | Quantitative | 163         | 10 to 19                           | Unclear                              | Community                   | None reported                                         | Adolescents reported very few practical or infrastructure barriers to accessing digital mental health resources. Majority were interested in using mental health apps to monitor their own mental health and expected that digital solutions could benefit adolescents with symptoms of mental distress. Stigma, shame, and embarrassment were major barriers to help-seeking and professional help was only preferred for more severe conditions such as psychosis and substance abuse. |
| Chung, 2020                                  | Jamaica  | To investigate the association between children's perception of their communities and their levels of depressive symptoms.                                                                                               | Depressive symptoms                                                              | The Adolescent Depression Rating Scale (ADRS)                                                                                                                                                              | Quantitative | 321         | 10 to 12                           | 49.8% females (7.8% did not respond) | Education                   | None reported                                         | There were significant associations between neighbourhood factors and depressive symptoms while neighbourhood factors and social class were predictive of children's depressive symptoms.                                                                                                                                                                                                                                                                                                |
| Gardner, 2019                                | Jamaica  | To explore the associations of perceived family and peer social support, self-esteem, and psychological well-being.                                                                                                      | Multiple: self-esteem, psychological well-being, stress, anxiety, and depression | Depression, Anxiety, and Stress Scale–Short Form (DASS-21); Psychological Well-being Scale–Short Version (PWB-18); Multidimensional Scale of Perceived Social Support; Rosenberg's Self-Esteem (RSE) Scale | Quantitative | 334         | 14.56 (1.94)                       | 51% males                            | Education                   | None reported                                         | Family support showed direct and indirect associations with depression, anxiety, stress, and well-being through self-esteem while peer support only showed a direct positive association with well-being.                                                                                                                                                                                                                                                                                |
| Johnson, 2019                                | Guyana   | To explore the police officers experience in dealing with the adolescents who made a non-fatal attempt to commit suicide.                                                                                                | Suicidality                                                                      | Not applicable                                                                                                                                                                                             | Qualitative  | 13          | Adolescents                        | 55.41% females                       | Community                   | University of the West Indies, St Augustine Campus    | Police officers described four main issues which suicidal adolescents typically present: relationship problems, family conflict, conflicts regarding sexual orientation and peer pressure.                                                                                                                                                                                                                                                                                               |
| Baker-Henningham, 2019                       | Jamaica  | To investigate the effect of a school-based violence prevention programme.                                                                                                                                               | Behaviour and conduct problems                                                   | Observations; Emotional SupportDomain in the Classroom Assessment Scoring System (CLASS-K-3)                                                                                                               | Quantitative | 220         | 6 to 7                             | 54% males                            | Education                   | Grand Challenges Canada (Global Mental Health Stream) | Intervention teachers provided more emotionally supportive classroom environment. No significant benefits were found toclass-wide prosocial behaviour, teacher wellbeing, or child mental health.                                                                                                                                                                                                                                                                                        |

|                 |                     |                                                                                                                                                                                                                                                           |                                                              |                                                                                                                                 |              |      |                      |                |           |                        |                                                                                                                                                                                                                                                                                                                                                                                                          |
|-----------------|---------------------|-----------------------------------------------------------------------------------------------------------------------------------------------------------------------------------------------------------------------------------------------------------|--------------------------------------------------------------|---------------------------------------------------------------------------------------------------------------------------------|--------------|------|----------------------|----------------|-----------|------------------------|----------------------------------------------------------------------------------------------------------------------------------------------------------------------------------------------------------------------------------------------------------------------------------------------------------------------------------------------------------------------------------------------------------|
| Elledge, 2019   | Jamaica             | To investigate whether bullying victimization and parental involvement were associated with internalizing distress, suicidal thoughts and behaviour, and substance use in adolescents as well as whether parental involvement moderated the relationship. | Multiple: suicidality, internal distress (worry, loneliness) | Jamaica Global School-based Health Survey (GSHS)                                                                                | Quantitative | 1623 | 11 to 16             | 51.2% females  | Education | None reported          | Bullying victimization was uniquely and positively associated with feelings of loneliness, sleep difficulties due to worry, smoking frequency, and suicidality for both male and female adolescents as well as with alcohol use frequency for female adolescents.                                                                                                                                        |
| Bateman, 2019   | Jamaica             | To examine the psychological sequelae experienced by high-level athletes as a result of sport-related injuries based on a PTSD–self-efficacy framework.                                                                                                   | PTSD                                                         | Impact of Event Scale-Revised (IES-R); General Self-Efficacy Scale (GSES)                                                       | Quantitative | 46   | 18 to 24             | 65.2% males    | Education | None reported          | The presence of injury was a significant predictor of general PTSD and, specifically, hyperarousal symptoms; however, general self-efficacy was not found to predict trauma-related symptoms.                                                                                                                                                                                                            |
| Gardner, 2019   | Jamaica             | To examine the interacting effect of trait emotional intelligence on the association of self-esteem and depressive symptoms.                                                                                                                              | Depressive symptoms                                          | Depression, Anxiety and Stress Scale Short (DASS) Form; Rosenberg Self-esteem (RSE) Scale; Schutte Emotional Intelligence Scale | Quantitative | 334  | 14.74 (1.95)         | 51% males      | Education | None reported          | Lower self-esteem and trait-emotional intelligence was associated with more depressive symptoms.                                                                                                                                                                                                                                                                                                         |
| Descartes, 2019 | Trinidad and Tobago | To examine whether self-esteem predicted aggression.                                                                                                                                                                                                      | Behaviour and conduct problems                               | Direct and Indirect Aggression Scale (DIAS); Culture Free Self-Esteem Inventories (CFSEI-3)                                     | Quantitative | 170  | 9 to 15              | 52% females    | Education | None reported          | Global self-esteem was a stronger predictor of aggression for children than domain specific self-esteem. Domain specific self-esteem was a stronger predictor of aggression among adolescents.                                                                                                                                                                                                           |
| Youssef, 2018   | Trinidad and Tobago | To assess medical students' knowledge about and attitudes toward mental illness.                                                                                                                                                                          | Any                                                          | Medical Conditions Regard Scale (MCRS); 2) Previously validated measure to assess knowledge (unknown).                          | Quantitative | 356  | 24.7 (0.3)           | 64.04% females | Education | None reported          | Students revealed significant levels of stigmatization toward mental illness despite improvements in knowledge. Students recognized the need to prioritize treatment for persons with mental illness but did not want to be personally involved in the treatment process.                                                                                                                                |
| Oshi, 2018      | Barbados            | To examine the role alcohol plays in students' behaviour problems at school.                                                                                                                                                                              | Behaviour and conduct problems                               | National Secondary Schools Survey                                                                                               | Quantitative | 8109 | 14 (not specified)   | 59% females    | Education | None reported          | Neither past month nor year alcohol consumption by students was associated with frequent behaviour problems at school. Students under 17 years who had a relationship with a teacher that was not very bad were significantly less likely to engage in frequent behavioural problems.                                                                                                                    |
| Debowska, 2018  | Barbados & Grenada  | To uncover groups of youths with specific abuse profiles and identify how the abuse is associated with behavioural outcomes.                                                                                                                              | Behaviour and conduct problems                               | Author developed/adapted questionnaire                                                                                          | Quantitative | 1351 | 9 to 17              | 50.1% females  | Education | European Union         | Compared with members of low abuse groups, youths who reported having experienced high/moderate levels of various forms of violence, including those who were abused in multiple ways and across the two settings, were significantly more likely to engage in violent and hostile behaviours.                                                                                                           |
| Giray, 2018     | Jamaica             | To explore the quantity (frequency) and quality (priority, atmosphere, structure) of family mealtimes and associations with nutritional and emotional health in Jamaica.                                                                                  | Depressive symptoms                                          | Jamaican Youth Risk and Resiliency Behaviour Survey, Patient Health Questionnaire (Adapted)                                     | Quantitative | 366  | 13.8 (not specified) | 64% females    | Education | University of Illinois | High SES adolescents ate more unhealthily if their mothers had more difficulty finding time for family meals. Adolescents and mothers were more psychologically distressed if they themselves had more difficulty finding time for family meals, if they had fewer positive attitudes/behaviours around mealtime atmosphere, or if they were high SES individuals placing lower importance on mealtimes. |

|               |                     |                                                                                                                                               |                                          |                                                                                                                     |               |      |                      |               |            |                                                                   |                                                                                                                                                                                                                                                                                                                                                                    |
|---------------|---------------------|-----------------------------------------------------------------------------------------------------------------------------------------------|------------------------------------------|---------------------------------------------------------------------------------------------------------------------|---------------|------|----------------------|---------------|------------|-------------------------------------------------------------------|--------------------------------------------------------------------------------------------------------------------------------------------------------------------------------------------------------------------------------------------------------------------------------------------------------------------------------------------------------------------|
| Heron, 2017   | Jamaica             | To determine prevalence of suicidal behaviours and differences related to gender and alcohol use among Jamaican adolescents.                  | Suicidality                              | Suicidal Behaviours Questionnaire-Revised (SBQ_R)                                                                   | Quantitative  | 3471 | 10 to 19             | 58.8% females | Education  | United Nations Children's Fund                                    | There was no significant direct association between alcohol use and suicidal behaviour. Females who used alcohol had higher suicidal ideation and suicidal risk scores than females who did not use alcohol. No significant differences between male alcohol users and non-users and suicidal behaviour.                                                           |
| Kwangu, 2017  | Bahamas             | To estimate the prevalence of suicidal ideation and determine its correlates among adolescents.                                               | Suicidality                              | Global School-based student Health Survey (GSHS)                                                                    | Quantitative  | 1357 | 13 to 17             | 53.1% females | Education  | None reported                                                     | Suicidal ideation prevalence among adolescents was 18.2% (13.8% among males and 22.3% among females). Male gender was protective against suicidal ideation. Other variables were found to be risk factors for suicidal ideation, and these were; age below 16 years, anxiety, loneliness, bullied, physical fights, smoking cigarettes and parental understanding. |
| Siziya, 2017  | Guyana              | To monitor trends in the prevalence of health behaviours and establish protective factors.                                                    | Suicidality                              | Global School-based Health Survey (GSHS)                                                                            | Quantitative  | 2392 | Mode 14 to 15        | 51.5% female  | Education  | None reported                                                     | Suicidal ideation was reported by 23.5% (16.4% of male and 29.7% of female) participant. Correlates for suicidal ideation were age, gender, anxiety, loneliness, close friends, truancy, bullied, attacked, currently smoked cigarettes, alcohol abuse, current alcohol use and parental understanding.                                                            |
| Siziya, 2017  | Jamaica             | To determine prevalence of suicidal ideation as well as factors associated with suicidal ideation.                                            | Suicidality                              | Jamaica Global School-based Health Survey (GSHS)                                                                    | Quantitative  | 1623 | Grade 7 to 12        | 51.4% males   | Education  | None reported                                                     | Overall, 24.8% (23.0% of male and 25.8% of female) students reported suicidal ideation. Factors associated with suicidal ideation were age, gender, food security, anxiety, loneliness, close friends, truancy, bullied, currently smoked cigarettes, alcohol consumption [currently drank alcohol and alcohol abuse and parental understanding.                   |
| Denton, 2017  | Guyana              | To describe and identify risk and protective factor correlates of youth suicidal behaviour among those at highest risk for suicide – orphans. | Suicidality                              | DSM-5 Level 1 Cross-Cutting Symptom Measure; Behavioural Assessment Schedule for Children, 2nd Edition (BASC-2)     | Mixed Methods | 25   | 12.7 (not specified) | 52% females   | Healthcare | None reported                                                     | Nine of the 25 (36%) orphans reported a previous suicide attempt. Youths who endorsed suicidal behaviour had clinically elevated interpersonal relations scale scores when compared to youth who did not.                                                                                                                                                          |
| Graham, 2016  | Jamaica             | To determine the levels of stress among students.                                                                                             | Stress                                   | Author developed/adapted questionnaire                                                                              | Quantitative  | 106  | 23.16 (9.0)          | 97.2% females | Education  | None reported                                                     | Students enrolled at 2 nursing schools experienced moderately high levels of stress in the clinical environment. Financial concerns and interaction with ward staff were significant sources of stress.                                                                                                                                                            |
| Youssef, 2016 | Trinidad and Tobago | To explore the prevalence of stress, burnout, and depressive symptoms and associated risk factors among medical students.                     | Multiple: depressive symptoms and stress | Maslach Burnout Inventory (MBI); Perceived Medical School Stress scale (PMSS); Patient Health Questionnaire (PHQ-9) | Quantitative  | 381  | 22.4 (3)             | 67% females   | Education  | None reported                                                     | Students demonstrated high levels of stress and a significant prevalence of burnout (52%) and depressive symptoms (40%). Students who felt they lacked emotional support, had little opportunity for relaxation and exercise, and did not feel they had control of their daily schedule all demonstrated higher levels of burnout and depressive symptoms.         |
| Maguire, 2016 | Trinidad and Tobago | To examine family risk factors that impact adolescents' social decision making and behaviour.                                                 | Behaviour and conduct problems           | Trinidad & Tobago Youth Survey (TTYS)                                                                               | Quantitative  | 2552 | 15.4 (not specified) | 60% females   | Education  | Government : Ministry of National Security of Trinidad and Tobago | Adult history of antisocial behaviour and parental attitudes were favourable toward antisocial behaviour and substance use emerge as the most robust risk factors.                                                                                                                                                                                                 |

|                        |                                                                      |                                                                                                                      |                                                 |                                                                                                                                                                                 |               |      |                      |                |            |                                                                                                                                                        |                                                                                                                                                                                                                                                                                                                                                                                                                                                                                                                                                                       |
|------------------------|----------------------------------------------------------------------|----------------------------------------------------------------------------------------------------------------------|-------------------------------------------------|---------------------------------------------------------------------------------------------------------------------------------------------------------------------------------|---------------|------|----------------------|----------------|------------|--------------------------------------------------------------------------------------------------------------------------------------------------------|-----------------------------------------------------------------------------------------------------------------------------------------------------------------------------------------------------------------------------------------------------------------------------------------------------------------------------------------------------------------------------------------------------------------------------------------------------------------------------------------------------------------------------------------------------------------------|
| Harrison, 2015         | Jamaica                                                              | To determine the prevalence, risk and protective factors associated with disordered eating behaviours and attitudes. | Disordered Eating Behaviours and Attitudes      | Rosenberg Self-Esteem (RSE) scale; EAT-26 scale; Parent and Peer Attachment Scales.                                                                                             | Quantitative  | 524  | 14.9 (not specified) | 56% females    | Education  | Caribbean Public Health Agency (CARPHA)                                                                                                                | 23% of participants had scores $\geq 20$ with bingeing being the most common. Higher scores were associated with females, having a history of sexual abuse and higher negative affect. Protective factors included living with their father.                                                                                                                                                                                                                                                                                                                          |
| Toussaint, 2015        | Trinidad and Tobago                                                  | To examine religiousness and its connection to suicidal thoughts, plans, and attempts.                               | Suicidality                                     | Trend Research Empowering National Development (TREND)                                                                                                                          | Quantitative  | 4448 | 18.14 (1.16)         | 57% females    | Community  | None reported                                                                                                                                          | Compared to nonreligious, Catholics and Seventh-day Adventists were less likely to think about suicide, and Hindus and other affiliates were more likely to be treated for suicide. Higher self-rated religiosity was related to lower likelihood of thinking about suicide and lower likelihood of planning suicide. Attendance at religious services was related to lower likelihood of thinking about suicide and fewer suicide attempts. More frequent prayer was related to lower likelihood of thinking about suicide and lower likelihood of planning suicide. |
| Jackson Williams, 2014 | Jamaica                                                              | To examine predictors of psychological help-seeking attitudes among adolescents.                                     | Any                                             | Attitudes Toward Seeking Professional Psychological Help scale (ATSPPHS); Opinions about Mental Illness scale; Brief Symptom Inventory (BSI)                                    | Quantitative  | 339  | 15 to 19             | 57% females    | Education  | None reported                                                                                                                                          | Increased age, decreased authoritarian beliefs, and increased benevolence predicted more positive attitudes toward seeking psychological help.                                                                                                                                                                                                                                                                                                                                                                                                                        |
| Lowe, 2014             | Jamaica, Bahamas, St. Vincent and the Grenadines & St. Kitts & Nevis | To examine the association of perceived neighbourhood conditions with depressive symptoms.                           | Depressive symptoms                             | Beck Depression Inventory (BDI-II)                                                                                                                                              | Quantitative  | 1955 | 15.3 (0.95)          | 52.1% females  | Education  | University of the West Indies                                                                                                                          | 52.1% reported mild to severe depressive symptoms. Neighbourhood factors were more highly associated with depression in Jamaica than the other islands.                                                                                                                                                                                                                                                                                                                                                                                                               |
| Wilson-Mitchel, 2014   | Jamaica                                                              | To explore the experiences and the impact of pregnancy on adolescents psychological health.                          | Multiple: psychological distress or suicidality | Not applicable                                                                                                                                                                  | Mixed Methods | 30   | 15.6 (0.93)          | 100% females   | Healthcare | International Development Research Centre (IDRC); Canada Latin America and the Caribbean Research Exchange Grants Program (LACREG); Ryerson University | Themes emerged describing decision-making, resilience, social support, community support system, distress, and perceptions of services.                                                                                                                                                                                                                                                                                                                                                                                                                               |
| McFarlane, 2014        | Jamaica                                                              | To assess the prevalence of depression and the associated risk factors in youths.                                    | Depressive symptoms                             | Jamaica Youth Risk and Resiliency Behaviour Survey; The Ministry of Health screening tool (adaptation of the Diagnostic and Statistical Manual of Mental Disorders 4th Edition) | Quantitative  | 1312 | 15 to 19             | 54.57% females | Community  | US Agency for International Development                                                                                                                | The results show that the prevalence of depression is high in this age group (males=9.7%, females=21.3%, total=15.5%).                                                                                                                                                                                                                                                                                                                                                                                                                                                |
| Maguire, 2013          | Trinidad and Tobago                                                  | To develop measures of family risk and protective factors for adolescent problem behaviours.                         | Behaviour and conduct problems                  | Trinidad and Tobago Youth Survey (TTYS)                                                                                                                                         | Quantitative  | 2552 | 15.4 (not specified) | 60% females    | Education  | Government : Ministry of National Security and                                                                                                         | The measures have strong construct validity.                                                                                                                                                                                                                                                                                                                                                                                                                                                                                                                          |

|                        |                                                                                  |                                                                                                                                                 |                                                   |                                                                                                                 |              |      |                       |                |           |                                             |                                                                                                                                                                                                                                                                                                                                                                                  |
|------------------------|----------------------------------------------------------------------------------|-------------------------------------------------------------------------------------------------------------------------------------------------|---------------------------------------------------|-----------------------------------------------------------------------------------------------------------------|--------------|------|-----------------------|----------------|-----------|---------------------------------------------|----------------------------------------------------------------------------------------------------------------------------------------------------------------------------------------------------------------------------------------------------------------------------------------------------------------------------------------------------------------------------------|
|                        |                                                                                  |                                                                                                                                                 |                                                   |                                                                                                                 |              |      |                       |                |           | Ministry of Education                       |                                                                                                                                                                                                                                                                                                                                                                                  |
| Smith, 2013            | Jamaica                                                                          | To examine the relationship between parenting style and adolescents' psychological and behavioural well-being.                                  | Multiple: psychological and behavioural wellbeing | Massachusetts Youth Screening Instrument: Version 2 (MAYSI-2)                                                   | Quantitative | 563  | 15.10 (not specified) | 57.2% females  | Education | University of Tennessee                     | Authoritarian parenting was associated with diminished psychological and behavioural adjustment, such that adolescents who reported their parents as more authoritarian also reported a greater risk of anger depression, suicide ideation, and conduct problems.                                                                                                                |
| Guzder, 2013           | Jamaica                                                                          | To assess the effectiveness of a multimodal after school and summer intervention called the Dream-A-World (DAW) Project.                        | Behaviour and conduct problems                    | Achenbach System of Empirically Based Assessment (ASEBA) Teacher Report Form                                    | Quantitative | 30   | 9.1 (0.41)            | 57% males      | Education | University of the West Indies, Mona Campus  | The intervention group made significant improvements in school social and behaviour adjustment with more successful outcome amongst boys for behavioural gains. No significant improvements were made by the girls.                                                                                                                                                              |
| Jackson Williams, 2013 | Jamaica                                                                          | To compare attitudes towards seeking professional psychological services.                                                                       | Any                                               | Attitudes Toward Seeking Professional Psychological Help scale                                                  | Quantitative | 279  | 17.18 (0.76)          | 56.63% females | Education | None reported                               | Jamaicans were generally found to be either similar or more positive in their attitudes toward seeking professional psychological help.                                                                                                                                                                                                                                          |
| Smith, 2012            | Jamaica                                                                          | To examine the relationships among selected family interaction variables and psychosocial outcomes.                                             | Multiple                                          | Massachusetts Youth Screening Instrument Version 2 (MAYSI-2); Author-developed behaviour problem questionnaire. | Quantitative | 171  | 15.14 (1.40)          | 54.2% males    | Education | None reported                               | Family interaction variables (e.g., physical violence and verbal aggression) were positively associated with problematic adolescents' adjustment.                                                                                                                                                                                                                                |
| Baker-Henningham, 2012 | Jamaica                                                                          | To determine the effects of a universal pre-school-based intervention on child conduct problems and social skills at school and at home.        | Behaviour and conduct problems                    | Not applicable                                                                                                  | Quantitative | 225  | 3 to 6                | 61% males      | Education | Wellcome Trust Research Training Fellowship | A low-cost, school-based intervention in a middle-income country substantially reduced child conduct problems and increased child social skills at home and at school.                                                                                                                                                                                                           |
| Jackson Williams, 2012 | Jamaica                                                                          | To examine adolescents' preferential sources of help for a variety of psychological problems and perceptions of the usefulness of seeking help. | Any                                               | Author developed single item measure: Where Do You Go To For Help?                                              | Quantitative | 339  | 17.18 (0.76)          | 57% female     | Education | None reported                               | Results of rank ordered data indicated that for many psychological problems, Jamaican adolescents were likely to first turn to friends and family for help. Faith healers, teachers and guidance counselors were consistently identified as the last sources of help among this population.                                                                                      |
| Lipps, 2012            | Jamaica, Bahamas, St. Vincent and the Grenadines & St. Kitts and Nevis           | To examine the association of parenting styles to levels of depressive symptoms among adolescents.                                              | Depressive symptoms                               | Parenting Practices Scales (PPS); Beck Depression Inventory - II (BDI-II)                                       | Quantitative | 1955 | 15.3 (0.95)           | 52.1% females  | Education | University of the West Indies - Mona        | Nearly half (52.1%) of all adolescents reported mild to severe symptoms of depression with 29.1% reporting moderate to severe symptoms of depression. Authoritative and permissive parenting styles were both associated with lower levels of depressive symptoms in adolescents. The relationship of parenting styles to depression scores was not consistent across countries. |
| Abdirahman, 2012       | Cayman Islands, St Lucia, St Vincent and the Grenadines, and Trinidad and Tobago | To examine the associations between peer victimization, mental health, and parental involvement.                                                | Multiple: depression, anxiety, loneliness         | Global School-based Student Health Survey (GSHS)                                                                | Quantitative | 6780 | 13 to 15              | 52.98% females | Education | None reported                               | ~25% reported having been bullied in the past month. Nearly 25% of students reported sadness and hopelessness, more than 10% reported loneliness and anxiety and more than 15% reported having seriously considered suicide in the past year.                                                                                                                                    |

|                        |                     |                                                                                                                                                                           |                                        |                                                                                   |              |      |                                  |                 |                  |                                                                |                                                                                                                                                                                                                                                                                                                       |
|------------------------|---------------------|---------------------------------------------------------------------------------------------------------------------------------------------------------------------------|----------------------------------------|-----------------------------------------------------------------------------------|--------------|------|----------------------------------|-----------------|------------------|----------------------------------------------------------------|-----------------------------------------------------------------------------------------------------------------------------------------------------------------------------------------------------------------------------------------------------------------------------------------------------------------------|
| Abel, 2012             | Jamaica             | To examine the prevalence of self-reported depressive symptoms, and the associated sociodemographic factors.                                                              | Depressive symptoms                    | Caribbean Adolescent Health Survey (PAHO); Global School Health Survey (WHO),     | Quantitative | 3003 | 12.45 (1.68)                     | 52.65 % females | Education        | None reported                                                  | 4.5% reported depressive symptoms. Negative community attributes and protective factors within the home, gender, and learning problems were associated with depressive symptoms.                                                                                                                                      |
| Holder-Nevins, 2012    | Jamaica             | To establish adolescent suicide rates for the years 2007-2010 and provide related epidemiological data.                                                                   | Suicidality                            | Case notes                                                                        | Quantitative | 26   | 16 (3.01)                        | 76.9% males     | Community Police | None reported                                                  | The incidence for suicide in adolescents was 1.1 per 100 000. Most suicide cases were students and the majority of cases were from rural areas (65%). Hanging was the main method used to commit suicide (96.2%).                                                                                                     |
| Williams-Johnson, 2012 | Jamaica             | To document the characteristics of self-poisoning suicide attempters.                                                                                                     | Suicidality                            | Author developed/adapted questionnaire                                            | Quantitative | 127  | Mode 16 to 20 and 56.7% under 25 | 75.6% females   | Healthcare       | None reported                                                  | The most common reason for suicide attempt was interpersonal conflict.                                                                                                                                                                                                                                                |
| Abell, 2012            | Jamaica             | To determine the prevalence of suicidal ideation and examine the association between suicidal ideation and sociodemographic characteristics, protective and risk factors. | Suicidality                            | Global School Health Survey (WHO)                                                 | Quantitative | 2997 | 10 to 15                         | 52.69% females  | Education        | None reported                                                  | The prevalence rate of suicidal ideation was 9.7%. Correlates of suicidal ideation were being female, being depressed, living in a rural area, liking oneself, indulging in aggressive behaviour, considered harming others, protective factors in the home, involvement in risky behaviour and being teased/bullied. |
| Hull, 2011             | Jamaica             | To examine the tenability of a higher order factor structure of personality with Jamaican adolescents and young adults.                                                   | Personality                            | NEO-Five Factor Inventory                                                         | Quantitative | 1018 | 17 to 24                         | 59% females     | Community        | Inter-American Development Bank                                | A model with five first order factors and one higher order factor fit Jamaican data.                                                                                                                                                                                                                                  |
| Maguire, 2011          | Trinidad and Tobago | To examine the validity of the community risk and protective factor measures developed by researcher in the Communities that Care program.                                | Behaviour and conduct problems         | Trinidad and Tobago Youth Survey (TTYS)                                           | Quantitative | 2552 | 15.4 (not specified)             | 60% females     | Education        | Government : Ministry of National Security Trinidad and Tobago | Existing measures of risk and protective factors have weak construct validity when applied to youth in Trinidad and Tobago.                                                                                                                                                                                           |
| Smith, 2011            | Jamaica             | To examine the relationship between physical punishment and socioemotional wellbeing.                                                                                     | Multiple                               | Massachusetts Youth Screening Instrument-2 (MAYSI-2); Rosenberg Self-esteem Scale | Quantitative | 563  | 15.08 (not specified)            | 57.2% females   | Education        | University of Tennessee                                        | Physical punishment was significantly associated with adverse psychological and behavioural consequences.                                                                                                                                                                                                             |
| Lipps, 2010            | Jamaica             | To investigate if students who attended non-traditional high schools would have higher levels of depressive symptoms than those in traditional high schools.              | Depressive symptoms                    | Beck Depression Inventory-II (BDI-II)                                             | Quantitative | 278  | 15.0 (0.6)                       | 52% females     | Education        | New Initiatives Grant                                          | Students attending non-traditional high schools reported significantly higher depression scores than students in traditional schools.                                                                                                                                                                                 |
| Galler, 2010           | Barbados            | To examine the prevalence of depressive symptoms in youths with histories of infantile malnutrition.                                                                      | Depressive symptoms                    | Minnesota General Adjustment and Morale Scale                                     | Quantitative | 177  | 11 to 17                         | Unclear         | Education        | National Institute of Health                                   | Childhood malnutrition was associated with impaired cognitive and behavioural outcomes. Depressive symptoms were elevated in 11–17-year-olds with histories of malnutrition in the first year of life relative to healthy classmates.                                                                                 |
| Alleyne, 2010          | Barbados            | To examine stress and life satisfaction among university students.                                                                                                        | Multiple: stress and life satisfaction | Satisfaction with Life Scale (SLS); Perceived Stress Scale (PSS)                  | Quantitative | 172  | 24.9 (not specified)             | 70% females     | Education        | None reported                                                  | Higher levels of perceived stress were associated with lower levels of satisfaction with life.                                                                                                                                                                                                                        |

|                        |                                                               |                                                                                                                           |                                         |                                                                                                                                                                                        |              |      |               |               |           |                                                                                                           |                                                                                                                                                                                                                                                                                                                                                                                                                                                                   |
|------------------------|---------------------------------------------------------------|---------------------------------------------------------------------------------------------------------------------------|-----------------------------------------|----------------------------------------------------------------------------------------------------------------------------------------------------------------------------------------|--------------|------|---------------|---------------|-----------|-----------------------------------------------------------------------------------------------------------|-------------------------------------------------------------------------------------------------------------------------------------------------------------------------------------------------------------------------------------------------------------------------------------------------------------------------------------------------------------------------------------------------------------------------------------------------------------------|
| Kukoyi, 2010           | Jamaica                                                       | To conduct a preliminary investigations of risk factors associates with suicide ideation and attempt among youths.        | Suicidality                             | 9-country Caribbean survey (Adapted)                                                                                                                                                   | Quantitative | 342  | 10 to 19      | 52.2% females | Education | National Centre on Minority Health and Health Disparities; National Institutes of Health                  | History of self-violence, violent thoughts toward others, mental health diagnoses other than depression, and a history of sexual abuse were positively associated with suicide attempt. Sexual abuse, mental health diagnoses other than depression, self-violence, and ease of access to lethal substances/weapons were positively associated with suicide ideation.                                                                                             |
| Lipps, 2010            | Jamaica, St. Vincent and the Grenadines & St. Kitts and Nevis | To examine the levels of depressive symptoms among students.                                                              | Depressive symptoms                     | Beck Depression Inventory II (BDI-II)                                                                                                                                                  | Quantitative | 1738 | 12 to 19      | 52% females   | Education | None reported                                                                                             | Roughly half (53%) of the students reported some symptoms of depression with 19.2% reporting moderate and 10.7% reporting severe symptoms of depression. Students in Jamaica reported significantly higher depression scores than those in either St. Kitts and Nevis or St. Vincent and the Grenadines. Students assigned to a higher academic track reported significantly lower depression scores than students who were assigned to the lower academic track. |
| Jimerson, 2009         | St. Vincent and the Grenadines                                | To examine peer status, academic scores and teacher-ratings of delinquency, learning problems, conduct and sensitivity.   | Behaviour and conduct problems          | Revised Behaviour Problem Checklist (RBPC)                                                                                                                                             | Quantitative | 168  | 9.54 (2.04)   | 56% males     | Community | Spencer Foundation; Mellon Foundation; Johann Jacobs Foundation; Sigma Xi Grant-in-Aid; NIDA centre grant | Children who were considered sensitive and withdrawn by their teachers, children who were considered delinquent and antisocial and older children had lower academic scores. Rejected and controversial children were also rated as having more learning problems than the other children.                                                                                                                                                                        |
| Maynard, 2009          | Barbados                                                      | To examine the coping strategies of problem adolescents.                                                                  | Behaviour and conduct problems          | Not applicable                                                                                                                                                                         | Qualitative  | 20   | 14 to 16      | 50% males     | Education | None reported                                                                                             | Coping strategies were identified as problem-focused, emotion-focused, support seeking and avoidance coping.                                                                                                                                                                                                                                                                                                                                                      |
| Lowe, 2009             | St. Kitts & Nevis                                             | To examine levels of depression.                                                                                          | Depressive symptoms                     | Beck Depression Inventory- II (BDI-II)                                                                                                                                                 | Quantitative | 744  | 15.5 (0.8)    | 50.4% females | Education | None reported                                                                                             | 62.1% (6 in 10) students reported some symptoms of depression. 14.8% reported moderate to severe and 9.7% reported severe symptoms.                                                                                                                                                                                                                                                                                                                               |
| Lowe, 2009             | Jamaica                                                       | To examine the factors associated with depression.                                                                        | Depressive symptoms                     | Brief Screen for Depression (BSD: 16)                                                                                                                                                  | Quantitative | 690  | 23.4 (7.4)    | 77% females   | Education | None reported                                                                                             | 4 in 10 students (39.1%) scored in the clinically depressed range. Females reported significantly higher levels of depressive symptoms.                                                                                                                                                                                                                                                                                                                           |
| Baker-Henningham, 2009 | Jamaica                                                       | To evaluate the effect of a preventative intervention in Jamaican schools on child behaviour and parent-teacher contacts. | Behaviour and conduct problems          | Strengths and Difficulties Questionnaire (SDQ)                                                                                                                                         | Quantitative | 135  | Pre-schoolers | 65.19% males  | Education | Environmental Foundation of Jamaica; UNICEF                                                               | The intervention had significant benefits for conduct problems, hyperactivity and peer problems.                                                                                                                                                                                                                                                                                                                                                                  |
| Dookeran, 2009         | Barbados, Jamaica, Trinidad and Tobago                        | To determine whether dissatisfaction with one's body was associated with unhealthy behaviours.                            | Multiple: disordered eating, depression | Eating Attitudes Test (EAT-26); Body Shape Questionnaire (BSQ-16); Body Silhouette Chart; Rosenberg Self-Esteem Scale (RSE); Centre for Epidemiologic Studies depression scale (CES-D) | Quantitative | 383  | 21 (2.8)      | 51.96 males   | Education | None reported                                                                                             | 4.2% of participants reported to have been diagnosed with an eating problem. Females had significantly higher problem scores than males.                                                                                                                                                                                                                                                                                                                          |

|                     |                     |                                                                                                                                   |                                |                                                                                                                                                                                           |              |      |                    |               |           |                                                                                                                                                                             |                                                                                                                                                                                                                                                                                                                                                                                                                                                                                              |
|---------------------|---------------------|-----------------------------------------------------------------------------------------------------------------------------------|--------------------------------|-------------------------------------------------------------------------------------------------------------------------------------------------------------------------------------------|--------------|------|--------------------|---------------|-----------|-----------------------------------------------------------------------------------------------------------------------------------------------------------------------------|----------------------------------------------------------------------------------------------------------------------------------------------------------------------------------------------------------------------------------------------------------------------------------------------------------------------------------------------------------------------------------------------------------------------------------------------------------------------------------------------|
| Maharaj, 2008       | Trinidad and Tobago | To determine the prevalence of depression and psychosocial factors associated with depression.                                    | Depressive symptoms            | Beck Depression Inventory (BDI-II)                                                                                                                                                        | Quantitative | 1290 | 13 to 19           | 58.2% females | Education | None reported                                                                                                                                                               | The prevalence of depression was 25.3%. Females, adolescents not living with both parents and adolescents afraid of their parents or of being injured by parents were more likely to be depressed.                                                                                                                                                                                                                                                                                           |
| Turton, 2007        | Bermuda             | To examine the effectiveness of function-based intervention with an adolescent girl with behavioural disorders.                   | Behaviour and conduct problems | Not applicable                                                                                                                                                                            | Qualitative  | 1    | 16-year-old        | 100% females  | Education | Not reported                                                                                                                                                                | A function-based intervention was effective in reducing problem behaviours and increasing replacement behaviours.                                                                                                                                                                                                                                                                                                                                                                            |
| Rudatsikira, 2007   | Guyana              | To estimate the prevalence and associated factors of suicidal ideation.                                                           | Suicidality                    | Guyana Global School-Based Health Survey (GSHS)                                                                                                                                           | Quantitative | 1197 | 14 (not specified) | 51% females   | Education | None reported                                                                                                                                                               | 18.4% (14.9% males and 21.6% females) reported having seriously considered committing suicide in the last 12 months. Males were less likely to seriously consider committing suicide than females. Subjects who reported having been bullied were more than twice as likely to contemplate committing suicide. History of depression was positively associated with suicidal ideation while having close friends and understanding parents were negatively associated with suicide ideation. |
| Ekundayo, 2007      | Jamaica             | To determine the prevalence of depressive symptoms and its' associated factors.                                                   | Depressive symptoms            | Beck's Depression inventory II (BDI-II)                                                                                                                                                   | Quantitative | 748  | 14 to 19           | 64.7% females | Education | Fogarty International Centre, National Institute of Health; Ministry of Health, Jamaica                                                                                     | 14.2% of participants reported depressive symptoms. There was an association between engagement in sexual activity, parental monitoring of adolescent activity, maternal affection and support, and paternal affection and support with self-reported depressive symptoms at the bivariate level.                                                                                                                                                                                            |
| Meeks Gardner, 2007 | Jamaica             | To examine risk factors for aggression among boys.                                                                                | Behaviour and conduct problems | Author developed/adapted questionnaire                                                                                                                                                    | Quantitative | 202  | 11.6 (0.6)         | 100% males    | Education | UNICEF, Social Policy Analysis Project of the Planning Institute of Jamaica; Ministries of Health and of Education, Youth and Culture of Jamaica; Royal Netherlands Embassy | Exposure to neighbourhood violence, physical punishment at home and family discord were associated with increased risk; parents' being married, practising religion as a family and better school uniforms were associated with reduced risk.                                                                                                                                                                                                                                                |
| Lipps, 2007         | Jamaica             | To explore the internal consistency reliability and the concurrent and discriminant validity of the Beck Depression Inventory II. | Depressive symptoms            | Beck Depression Inventory-II (BDI-II); Centre for Epidemiology Studies-Depression (CES-D); Brief Screen for Depression (BSD); University of Los Angeles Loneliness Scale-Revised (UCLA-R) | Quantitative | 690  | 23.4 (7.4)         | 77% females   | Education | None reported                                                                                                                                                               | The BDI-II was found to have acceptable levels of reliability, concurrent and discriminatory validity.                                                                                                                                                                                                                                                                                                                                                                                       |



|                 |                     |                                                                                                                                                                         |                                            |                                                                                                                                                                                                                                      |              |      |                      |                |            |               |                                                                                                                                                                                                                                                                                                                                      |
|-----------------|---------------------|-------------------------------------------------------------------------------------------------------------------------------------------------------------------------|--------------------------------------------|--------------------------------------------------------------------------------------------------------------------------------------------------------------------------------------------------------------------------------------|--------------|------|----------------------|----------------|------------|---------------|--------------------------------------------------------------------------------------------------------------------------------------------------------------------------------------------------------------------------------------------------------------------------------------------------------------------------------------|
| Maharajh, 2006  | Trinidad and Tobago | To investigate depression in adolescents and trends associated with its occurrence.                                                                                     | Depressive symptoms                        | Reynolds Adolescent Depression Scale (RADS)                                                                                                                                                                                          | Quantitative | 1845 | 16.3 (1.13)          | 60% females    | Education  | None reported | 14% of the sample was depressed. Depression was more likely to occur in females. The peak age was 16 years with a rate of 15.9%. Religion and prayer, intact family, and attendance at prestige schools was associated with lower depression rates. Adolescents with alcohol abuse in their family were more likely to be depressed. |
| Steely, 2006    | Jamaica             | To analyse relationships among perceived parental justness and harshness of corporal punishment, perceived parental acceptance-rejection, and psychological adjustment. | Multiple: psychological adjustment         | Family History Assessment Form; Physical Punishment Questionnaire: Youth Form (Youth PPQ); Parental Acceptance-Rejection Questionnaire/Short Form (PARQ/Short Form); Personality Assessment Questionnaire: Child Version (Child PAQ) | Quantitative | 97   | 7 to 18              | 55% females    | Healthcare | None reported | Perceived harshness of punishment by itself had almost no direct effect on youths' psychological adjustment; however, the harsher the punishment was perceived to be, the more rejected youths felt. The more rejected youths felt, the more psychologically maladjusted they reported themselves to be.                             |
| Ramberan, 2006  | Trinidad and Tobago | To investigate the correlates of body image perception.                                                                                                                 | Disordered Eating Behaviours and Attitudes | EATING Attitudes Test (EATS-26); Body Shape Questionnaire (BSQ-16); Body Silhouette Chart; Rosenberg Self-Esteem Scale (RSE); Drive for thinness subscale of the Eating Disorder Inventory 2.                                        | Quantitative | 251  | 16.3 (1.37)          | 100% females   | Education  | None reported | 2.4% had a diagnosis of eating disorder. 51% had negative body image perception. Ethnicity was associated with concerns over body image, associated eating and weight-related behaviour.                                                                                                                                             |
| Lipps, 2006     | Jamaica             | To explore the concurrent and discriminant validity of the Brief Screen for Depression.                                                                                 | Depressive symptoms                        | Brief Screen for Depression (BSD); Beck Depression Inventory (BDI-II); Centre for Epidemiology Studies-Depression (CES-D); University of Los Angeles Loneliness Scale-Revised (UCLA-R)                                               | Quantitative | 244  | 22.7 (not specified) | 81.97% females | Education  | None reported | The BSD was found to have acceptable concurrent and discriminant validity.                                                                                                                                                                                                                                                           |
| Marlowe, 2005   | Bermuda             | To study the interaction of ethnicity, culture, gender and economic factors that influence abnormal eating attitudes.                                                   | Disordered Eating Behaviours and Attitudes | Bulimic Investigatory Test, Edinburgh (BITE); Eating Attitudes Test (EAT-40)                                                                                                                                                         | Quantitative | 836  | 12.2 (0.66)          | 52.5% females  | Education  | None reported | Lower socioeconomic status was associated with the risk of possible eating disorders. Developing anorexic eating attitudes were more prevalent compared to bulimic attitudes.                                                                                                                                                        |
| Maharajh, 2005  | Trinidad and Tobago | To examine the epidemiology of suicidal behaviour and cannabis use among adolescents and explore relationships.                                                         | Suicidality                                | Community Assessment of Psychic Experiences (CAPE) questionnaire                                                                                                                                                                     | Quantitative | 227  | 12 to 20             | Unclear        | Education  | None reported | Preliminary findings revealed that psychotic and depressive experiences were common in those using cannabis when compared to non-users. Cannabis use was higher in females at younger ages of 13 and 14.                                                                                                                             |
| Pottinger, 2005 | Jamaica             | To investigate children's experience of loss by parental migration.                                                                                                     | Loss and grief                             | Author developed/adapted questionnaire                                                                                                                                                                                               | Quantitative | 54   | 9 to 10              | 52% males      | Education  | None reported | Children's reactions were directly related to poor school performance and psychological difficulties. Being currently exposed to violence in the home and/or community was significantly associated with high scores on a measure of grief intensity. "Protective" factors included having someone to talk to                        |

|                 |                                                                       |                                                                                                                                                        |                                            |                                                                                      |              |       |                       |                |            |                                                                                 |                                                                                                                                                                                                                                                                                                                                                                                                                                                                                               |
|-----------------|-----------------------------------------------------------------------|--------------------------------------------------------------------------------------------------------------------------------------------------------|--------------------------------------------|--------------------------------------------------------------------------------------|--------------|-------|-----------------------|----------------|------------|---------------------------------------------------------------------------------|-----------------------------------------------------------------------------------------------------------------------------------------------------------------------------------------------------------------------------------------------------------------------------------------------------------------------------------------------------------------------------------------------------------------------------------------------------------------------------------------------|
|                 |                                                                       |                                                                                                                                                        |                                            |                                                                                      |              |       |                       |                |            |                                                                                 | about the migration and living in a supportive family.                                                                                                                                                                                                                                                                                                                                                                                                                                        |
| Maharajh, 2005  | Trinidad and Tobago                                                   | To investigate the occurrence of the most common mental disabilities.                                                                                  | Multiple                                   | Case notes (DSM criteria)                                                            | Quantitative | 349   | 14.4(2.85)            | 60% males      | Healthcare | None reported                                                                   | The most prominent diagnosis in younger children was learning disorders and ADHD. Conduct disorders, ADHD and depression were more common in children over 11.                                                                                                                                                                                                                                                                                                                                |
| Ali, 2004       | Trinidad and Tobago                                                   | To examine suicidal behaviours through psychological autopsy, secondary data and psychiatric populations with an emphasis on causation and prevention. | Suicidality                                | The Suicidal Ideation Questionnaire (SIQ)                                            | Quantitative | 1845  | 14 to 20              | 60% females    | Education  | None reported                                                                   | Gender differences existed for both suicidal ideation and attempts. Respondents from reconstituted families had higher suicidal ideation compared to other family structures, while intact families had the lowest rate for suicide attempts. Attendance to a religious institution lowered only suicidal ideation, while prayer with the family lowered both suicidal ideation and suicide attempts. Individuals with alcohol abuse in the family had higher suicidal ideation and attempts. |
| Maharajh, 2004  | Trinidad and Tobago                                                   | To investigate the prevalence of depressive symptoms, major depression and dysthymia in Tobago.                                                        | Depressive symptoms                        | Reynolds Adolescent Depression Scale (RADS); Patient Health Questionnaires (PHQ-9)   | Quantitative | 198   | 16.3 (not specified)  | 60% females    | Education  | None reported                                                                   | 10.1% of adolescents experienced a depressive disorder, of which 6.06% was rated as dysthymia and 4.04 as major depression.                                                                                                                                                                                                                                                                                                                                                                   |
| Halcón, 2003    | Antigua, Barbados, Bahamas, BVI, Dominica, Grenada, Guyana, St. Lucia | To assess prevalence and related factors associated with youth health.                                                                                 | Multiple                                   | Author developed/adapted questionnaire                                               | Quantitative | 15695 | 10 to 18              | 61% females    | Education  | Government of Italy; Pan American Health Organization ; University of Minnesota | Most adolescents saw themselves as generally happy. 1 in 6 were sad, angry, or irritable. 50% felt so "down" that they wondered if anything was worthwhile. Many of the young people reported a history of abuse.                                                                                                                                                                                                                                                                             |
| Bhugra, 2003    | Trinidad and Tobago, Barbados                                         | To investigate eating attitudes and the prevalence of bulimic disorders.                                                                               | Disordered Eating Behaviours and Attitudes | Bulimia Investigatory Test, Edinburgh (BITE); DSM-III-R Bulimia Diagnostic Interview | Quantitative | 362   | 13 to 19              | 100% females   | Education  | None reported                                                                   | 0.8% scored over the cut-off point on the BITE. None of the interviewees was diagnosed as having bulimia nervosa. 67.7% reported being terrified of becoming fat and fat-fear was associated with higher Body Mass Index, dieting and exercising for losing weight.                                                                                                                                                                                                                           |
| Pottinger, 2003 | Jamaica                                                               | To examine suicide attempts and ideation in children attending mental health clinics.                                                                  | Suicidality                                | Case notes (DSM criteria)                                                            | Quantitative | 57    | 12 (2.61)             | 60% females    | Healthcare | None reported                                                                   | Having poor relationships with primary carers and experiencing abuse were significantly associated with suicidal and externalising behaviours.                                                                                                                                                                                                                                                                                                                                                |
| Naidu, 2002     | Trinidad & Tobago                                                     | To investigate sources of stress and psychological disturbance in dental students.                                                                     | Stress                                     | Dental Environment Stress (DES)                                                      | Quantitative | 94    | 22 (not specified)    | 55% females    | Education  | None reported                                                                   | 54.8 percent of males and 44.2 percent of females were in the clinical range indicating significant psychological disturbance. Psychological disturbance was significantly associated with stress levels for male students.                                                                                                                                                                                                                                                                   |
| Baboolal, 2002  | Trinidad and Tobago                                                   | To describe the profile of medical students accessing psychiatric services.                                                                            | Multiple                                   | Case notes (DSM IV criteria)                                                         | Quantitative | 32    | 24.9 (2.83)           | 50% females    | Education  | None reported                                                                   | Relationship issues were the most common stressor. Mood and anxiety disorders were present in 59% of students.                                                                                                                                                                                                                                                                                                                                                                                |
| White, 2002     | Jamaica                                                               | To investigate the occurrence of eating disorders.                                                                                                     | Disordered Eating Behaviours and Attitudes | Author developed/adapted questionnaire                                               | Quantitative | 24    | 18.86 (not specified) | 90.91% females | Healthcare | None reported                                                                   | 24 cases of Anorexia and Bulimia cases were identified. The authors concluded that the occurrence of eating disorders was very low.                                                                                                                                                                                                                                                                                                                                                           |

|                       |                                |                                                                                                      |                                              |                                                                                                                     |               |     |                     |                |                      |                                                                                                  |                                                                                                                                                                                                                                                                                                                |
|-----------------------|--------------------------------|------------------------------------------------------------------------------------------------------|----------------------------------------------|---------------------------------------------------------------------------------------------------------------------|---------------|-----|---------------------|----------------|----------------------|--------------------------------------------------------------------------------------------------|----------------------------------------------------------------------------------------------------------------------------------------------------------------------------------------------------------------------------------------------------------------------------------------------------------------|
| Lambert, 2001         | Jamaica                        | To investigate differences in behaviour and emotional problem ratings of teachers and observers.     | Multiple: behavioural and emotional problems | Child Behaviour Checklist; Jamaican Teacher's Report Form                                                           | Mixed Methods | 78  | 8.7 (1.59)          | Unclear        | Education            | National Institute of Health; Michigan State University                                          | Significantly higher problem scores emerged for ratings by observers than those by teachers. Observers also rated younger children as more demanding and aggressive while both informants rated rural children as exhibiting more externalizing problems than urban children.                                  |
| Durbrow, 2000         | St. Vincent and the Grenadines | To examine factors that undermine academic performance.                                              | Multiple: anxiety and attention problems     | Middle Childhood-Home Inventory; Learning Behaviours Scale; Revised Behaviour problem Checklist                     | Quantitative  | 61  | 5 to 14             | 69% males      | Education            | None reported                                                                                    | The findings suggested that academic performance can be improved in this population by reducing children's anxiety levels and promoting appropriate learning behaviours.                                                                                                                                       |
| Foster-Williams, 2000 | Jamaica                        | To assess psychological distress in younger siblings of patients with sickle cell.                   | Psychological distress                       | General Health Questionnaire (GHQ); Chronicity and General Health Questionnaire; Social Adjustment Scale - Modified | Quantitative  | 20  | 16.5 to 18          | 65% females    | Healthcare           | None reported                                                                                    | Although psychological distress appeared high, it did not significantly differ between patients, their sibling and controls.                                                                                                                                                                                   |
| Lambert, 1999         | Jamaica                        | To assess behaviours of youth in the general public.                                                 | Behaviour and conduct problems               | Jamaican Youth Checklist (JYC)                                                                                      | Quantitative  | 864 | 6 to 18             | Unclear        | Education            | Institute for Public Policy and Social Research Excellence Award Fund; Michigan State University | Adolescents self-reported higher problem scores compared to the ratings they received from their parents and teachers. Girls received higher internalizing, and Somatic Complaints scores than boys. The clinical samples suggest that girls may not be receiving adequate services.                           |
| Perks, 1999           | St. Lucia                      | To assess the effects of domestic violence on a non-clinical population of children and adolescents. | Depressive symptoms                          | Reynolds Adolescent Depression Scale (RADS); Reynolds Child Depression Scales (RCDS);                               | Quantitative  | 60  | 9 to 17             | 60% females    | Education            | None reported                                                                                    | Pupils whose parents were experiencing violent marital discord showed significantly higher levels of both depression and behavioural problems.                                                                                                                                                                 |
| Phillips, 1997        | Trinidad & Tobago              | To determine the effectiveness/cultural appropriateness of the MMPI.                                 | Personality                                  | Minnesota Multiphasic Personality Inventory (MMPI)                                                                  | Quantitative  | 448 | 15 to 20            | 54.91% females | Education            | None reported                                                                                    | The findings suggest that with minor modifications the MMPI can be a useful instrument in the assessment of late adolescents in both the mental health and criminal justice systems in Trinidad and Tobago.                                                                                                    |
| Hilton, 1997          | Jamaica                        | To investigate the prevalence of psychiatric disorders.                                              | Multiple                                     | General health Questionnaire (GHQ); DSM; Modified social adjustment scale; Psychiatric assessment schedule          | Quantitative  | 89  | 18 to 20            | 50.56% females | Healthcare           | Wellcome Trust; Royal College of Psychiatrists                                                   | Rates of psychiatric disorders were 14% in males and 36% in females. Disorders were associated with female gender, unemployment, and social adjustment.                                                                                                                                                        |
| Deosaran, 1997        | Trinidad and Tobago            | To examine the social background and psychological dispositions of children in juvenile homes.       | Behaviour and conduct problems               | Author developed/adapted questionnaire                                                                              | Quantitative  | 486 | <18                 | 75.31% males   | Community Group Home | University of West Indies-CIDA Canadian Institutional Development Agency                         | Most youths came from working class backgrounds and homes without two parents. The youths were predominantly of African descent (70%) and with only primary school education (over 50%). The youths expressed substantial optimism in improving themselves, and in accepting responsibility for their actions. |
| Foster-Williams, 1996 | Jamaica                        | To examine the source of stress among medical students.                                              | Stress                                       | Questionnaire developed by the University of Texas.                                                                 | Quantitative  | 180 | University students | 50.56% females | Education            | None reported                                                                                    | The amount of content to be studied and exams and/or grades were rated as most stressful.                                                                                                                                                                                                                      |

|               |         |                                                                                         |                                |                                    |              |     |         |                |            |                                                                                                                                                                                                                                                                                 |                                                                                                                                                                                                                                |
|---------------|---------|-----------------------------------------------------------------------------------------|--------------------------------|------------------------------------|--------------|-----|---------|----------------|------------|---------------------------------------------------------------------------------------------------------------------------------------------------------------------------------------------------------------------------------------------------------------------------------|--------------------------------------------------------------------------------------------------------------------------------------------------------------------------------------------------------------------------------|
| Lambert, 1994 | Jamaica | To report empirical standardization of a child behaviour problem classification system. | Behaviour and conduct problems | Jamaican Teacher Check List (JTCL) | Quantitative | 359 | 6 to 11 | 50.7% females  | Education  | University of Mississippi; Berger paints, Culture Originale Bridal Salon; Cremo Ltd; Eagle Merchant Bank; Facey Commodity; International Trust and Merchant Bank; Island Car Rental; Metal Box; Palomino Brothers; Sherwin Williams; Tropichem Laboratories ; Ultimate Services | The JTCL was found to be appropriate for use by clinicians and researchers.                                                                                                                                                    |
| Lambert, 1993 | Jamaica | To compare teacher and parent ratings on child behaviour and emotional problems.        | Behaviour and conduct problems | Jamaican Youth Checklist           | Quantitative | 359 | 6 to 11 | 50.42% females | Education  | University of Mississippi; Berger paints, Culture Originale Bridal Salon; Cremo Ltd; Eagle Merchant Bank; Facey Commodity; International Trust and Merchant Bank; Island Car Rental; Metal Box; Palomino Brothers; Sherwin Williams; Tropichem Laboratories ; Ultimate Services | There was low to moderate correlations between parent and teacher reports on child behaviour and emotional problems.                                                                                                           |
| Lambert, 1990 | Jamaica | To examine teacher and parent reports of over and under controlled behaviours.          | Multiple                       | Clinical interview (DSM criteria)  | Quantitative | 180 | 6 to 17 | 52.22% females | Healthcare | University of North Carolina                                                                                                                                                                                                                                                    | There were significant correlations between parent and teacher ratings of under controlled problems. The overcontrolled problem score between parents and teachers only significantly correlated for rural children and girls. |

|                  |          |                                                                                                          |                                |                                                  |              |     |               |                |            |                              |                                                                                                                                                                                                                                                                                 |
|------------------|----------|----------------------------------------------------------------------------------------------------------|--------------------------------|--------------------------------------------------|--------------|-----|---------------|----------------|------------|------------------------------|---------------------------------------------------------------------------------------------------------------------------------------------------------------------------------------------------------------------------------------------------------------------------------|
| Richardson, 1989 | Barbados | To inquire about the personality priorities of Caribbean adolescents.                                    | Personality                    | Personality Priorities Inventory for Adolescents | Quantitative | 194 | 15.6 (0.29)   | 58.76% females | Education  | None reported                | The rank order which emerged from the analysis indicated preference for Pleasing behaviours followed in order by Significance, Avoiding, and Detaching. Comparison between the sexes showed girls as being more inclined toward Pleasing, Significance, and Avoiding than boys. |
| Lambert, 1989    | Jamaica  | To identify over and under controlled behaviours.                                                        | Multiple                       | Clinician developed questionnaire (DSM-criteria) | Quantitative | 320 | 6 to 17       | 50% females    | Healthcare | University of North Carolina | Over and under controlled behaviours were identified. School avoidance was correlated with crying in children 6-11 and with adolescents 12-17.                                                                                                                                  |
| Payne, 1988      | Barbados | To identify the nature of adolescent fears.                                                              | Anxiety/Fear                   | Author developed/adapted questionnaire           | Quantitative | 657 | 12 to 15      | 53.27% females | Education  | None reported                | Fear of injury or death of self or loved ones, sexual concerns and fears of school failure were most common.                                                                                                                                                                    |
| Payne, 1986      | Barbados | To explore the attitudes of teachers, parents, and secondary school students towards behaviour problems. | Behaviour and conduct problems | Author developed/adapted questionnaire           | Quantitative | 297 | 14 to 15      | 82.5% females  | Education  | None reported                | Parents rated most problems as more serious than teachers. Adults rated them higher than males, especially for conduct problems. Female students responded similarly to adults, except for heterosexual activity.                                                               |
| Burke, 1980      | Jamaica  | To investigate the aetiology of delinquency in the West Indies.                                          | Behaviour and conduct problems | Not applicable                                   | Quantitative | 28  | Mode 16 or 17 | 100% males     | Healthcare | None reported                | A third of a random sample of approved schoolboys had a neurotic disorder which can be treated by psychotherapy. Paternal deprivation and other factors were similarly distributed among personality disordered and neurotic delinquents in Jamaica.                            |
| Wray, 1976       | Jamaica  | To examine the effect of separation on clinical symptoms.                                                | Multiple                       | Clinical interview (DSM criteria)                | Quantitative | 154 | 10 (3)        | 57.7% males    | Healthcare | The Grant Foundation Inc     | Separated children most frequently experienced emotional and conduct disorders.                                                                                                                                                                                                 |
